# Supplementary material for: Baculovirus PTP2 Functions as a Pro-Apoptotic Protein
Source: Viruses. 2018 Apr 7;10(4):181. doi: 10.3390/v10040181 (PMC5923475; doi:10.3390/v10040181)
Supplement: Supplementary file 1 [file viruses-10-00181-s001.zip › Table S1.pdf]

**Table S1.** Primers used in this study.

| Primer number | Primer name                 | Sequence                                                                              | Aim                                                                        |
|---------------|-----------------------------|---------------------------------------------------------------------------------------|----------------------------------------------------------------------------|
| 1             | pIB-DEST <sub>mod</sub> -fw | GGGG <b>ACAAGTTTGTACAAAAAGCAGGC</b><br><b>TGGGAAGCTT</b> AATGTACAGCAGGCTC             | Amplify Acgp64 segment with attB1 and HindIII site                         |
| 2             | pIB-DEST <sub>mod</sub> -rv | GGGG <b>ACCACCTTTGTACAAGAAAGCTGGG</b><br><b>TCATT</b> CAGACTGGTGCCGACG                | Amplify Acgp64 segment with attB2 site                                     |
| 3             | pIB-Ac <sub>ptp</sub> -fw   | GGGG <b>ACAAGTTTGTACAAAAAGCAGGC</b><br><b>TGGGAAGCTT</b> ATGTTCCCGCGCGT               | Amplify Ac <sub>ptp</sub> ORF with attB1 and HindIII site                  |
| 4             | pIB-Ac <sub>ptp</sub> -rv   | GGGG <b>ACCACCTTTGTACAAGAAAGCTGGG</b><br><b>TTTAAATTAATAAATCTTGAACGTAATT</b><br>TTGTC | Amplify Ac <sub>ptp</sub> ORF with attB2 site                              |
| 5             | pIB-Septp2-fw               | GGGG <b>ACAAGTTTGTACAAAAAGCAGGC</b><br><b>TGGGAAGCTT</b> ATGCATACTAACGACGAC<br>AAC    | Amplify Septp2 and Septp2 <sup>C110S</sup> ORF with attB1 and HindIII site |
| 6             | pIB-Septp2-rv               | GGGG <b>ACCACCTTTGTACAAGAAAGCTGGG</b><br><b>TTCAAAATTC</b> ATTTGTGATTCCGGC            | Amplify Septp2 and Septp2 <sup>C110S</sup> ORF with attB2 site             |
| 7             | ptp2 <sup>C110S</sup> -fw1  | GGCGAGGGCAAAGGGTGTACGTTTCATA<br><b>G</b> CCATGCGGGCGTGTCTG                            | Create C110S mutation in SePTP2 catalytic site                             |
| 8             | ptp2 <sup>C110S</sup> -rv   | TCAAAATTCATTTGTGATTTC                                                                 | Amplify Septp2 ORF                                                         |
| 9             | ptp2 <sup>C110S</sup> -fw2  | ATGCATACTAACGACGACAAC                                                                 | Amplify Septp2 ORF                                                         |
| 10            | Δptp2-fw                    | ATTATAGTTTACGTCGCCGACGAAACAA<br>TCATTGATATCGTGGACACGAGCTCGGA<br>TCCACTAGTAACGG        | Create ptp2 ORF deletion                                                   |
| 11            | Δptp2-rv                    | ACTATGCATACTAACGACGACAACCTTTA<br>CGCAACTGTCCAACGGAACTGCCTCTA<br>GATGCATGCTCGAG        | Create ptp2 ORF deletion                                                   |
| 12            | Δptp2-check-fw              | ATGTGTGCTCTTCGTCAGATG                                                                 | Check ptp2 ORF deletion and RT-PCR on SeMNPV ptp2                          |
| 13            | Δptp2-check-rv              | TTCAATATAATAAGAAGAACTATGCA<br>TACT                                                    | Check ptp2 ORF deletion and RT-PCR on SeMNPV ptp2                          |
| 14            | Se-eIF5A-fw                 | GCCATGGCTGACATCGAGGATAC                                                               | RT-PCR on <i>S. exigua</i> eIF5A                                           |
| 15            | Se-eIF5A-rv                 | GCGGTACCGGTTTATTTGTCTGAGAGC                                                           | RT-PCR on <i>S. exigua</i> eIF5A                                           |
| 16            | Se-ie1-fw                   | GACAAGAATGACGATGATATCGG                                                               | RT-PCR on SeMNPV ie1                                                       |
| 17            | Se-ie1-rv                   | GGACAATTGCTTTTCCGAAAAC                                                                | RT-PCR on SeMNPV ie1                                                       |
