# Supplementary material for: Baculovirus PTP2 Functions as a Pro-Apoptotic Protein
Source: Viruses. 2018 Apr 7;10(4):181. doi: 10.3390/v10040181 (PMC5923475; doi:10.3390/v10040181)
Supplement: Supplementary file 1 [file viruses-10-00181-s001.zip › Table S2.pdf]

**Table S2.** *P* values of the one-way ANOVA of the relative luminescent units in the caspase assays. Values are given for each comparison.

[illegible]
