# Supplementary material for: Baculovirus PTP2 Functions as a Pro-Apoptotic Protein
Source: Viruses. 2018 Apr 7;10(4):181. doi: 10.3390/v10040181 (PMC5923475; doi:10.3390/v10040181)
Supplement: Supplementary file 1 [file viruses-10-00181-s001.zip › Table S3.pdf]

**Table S3.** TCID<sub>50</sub> values of BVs isolated from the hemolymph of WT and  $\Delta ptp2$  SeMNPV-infected larvae at 48 hpi.

|                      | Replicate 1<br>(TCID <sub>50</sub> /ml) | Replicate 2<br>(TCID <sub>50</sub> /ml) | Replicate 3<br>(TCID <sub>50</sub> /ml) |
|----------------------|-----------------------------------------|-----------------------------------------|-----------------------------------------|
| WT SeMNPV            | 8.91*10 <sup>6</sup>                    | 1.20*10 <sup>7</sup>                    | 2.11*10 <sup>7</sup>                    |
| $\Delta ptp2$ SeMNPV | 1.99*10 <sup>7</sup>                    | 1.58*10 <sup>7</sup>                    | 4.47*10 <sup>7</sup>                    |
