# Supplementary material for: Baculovirus PTP2 Functions as a Pro-Apoptotic Protein
Source: Viruses. 2018 Apr 7;10(4):181. doi: 10.3390/v10040181 (PMC5923475; doi:10.3390/v10040181)
Supplement: Supplementary file 1 [file viruses-10-00181-s001.zip › Table S4.pdf]

**Table S4.** Outcome of the logistic regression analysis of the infectivity assays. Per replicate, an odds ratio (relative potency) was determined: the ratio of the infectivity of  $\Delta ptp2$  SeMNPV relative to the infectivity of WT SeMNPV. The upper and lower limits of the 95% confidence interval are also given, as well as the *P* value.

| Replicate | Viruses              | Odds ratio | 95% Confidence Interval |       | <i>P</i> value |
|-----------|----------------------|------------|-------------------------|-------|----------------|
|           |                      |            | Low                     | High  |                |
| 1         | WT SeMNPV            | 1.000      | -                       | -     | -              |
|           | $\Delta ptp2$ SeMNPV | 1.616      | 0.946                   | 1.419 | 0.081          |
| 2         | WT SeMNPV            | 1.000      | -                       | -     | -              |
|           | $\Delta ptp2$ SeMNPV | 1.393      | 0.876                   | 2.225 | 0.163          |
| 3         | WT SeMNPV            | 1.000      | -                       | -     | -              |
|           | $\Delta ptp2$ SeMNPV | 1.120      | 0.687                   | 1.831 | 0.649          |
